# Supplementary material for: Association between gastrointestinal tract infections and glycated hemoglobin in school children of poor neighborhoods in Port Elizabeth, South Africa
Source: PLOS journal article supplement (doi:10.1371/journal.pntd.0006332), 2018-03-15
Supplement: S3 (10.1371/journal.pntd.0006332.s003) [file journal.pntd.0006332.s003]

**S1 Table. Multiple Component Analysis (MCA) of SES of the participants**

| <b>SES variables</b>                      | <b>Dimension of<br/>MCA</b> |
|-------------------------------------------|-----------------------------|
| <b>Washing machine</b>                    |                             |
| Yes                                       | 0.571                       |
| No                                        | -1.502                      |
| <b>Fridge</b>                             |                             |
| Yes                                       | 0.361                       |
| No                                        | -4.047                      |
| <b>Freezer</b>                            |                             |
| Yes                                       | 0.566                       |
| No                                        | -2.468                      |
| <b>Radio</b>                              |                             |
| Yes                                       | 0.254                       |
| No                                        | -.968                       |
| <b>Landline phone</b>                     |                             |
| Yes                                       | 0.878                       |
| No                                        | -0.394                      |
| <b>Television</b>                         |                             |
| Yes                                       | 0.084                       |
| No                                        | -2.641                      |
| <b>Car</b>                                |                             |
| Yes                                       | 0.612                       |
| No                                        | -0.959                      |
| <b>Computer</b>                           |                             |
| Yes                                       | 0.640                       |
| No                                        | -1.013                      |
| <b>Types of houses</b>                    |                             |
| Shack in informal settlement              | -3.735                      |
| Backyard shack/room/privately built house | -0.259                      |
| RDP/Council house/rented flat/hostel      | 0.503                       |
| <b>House materials</b>                    |                             |
| Zinc                                      | 0.401                       |
| Brick/wood                                | -0.044                      |
| <b>No of bedrooms in house</b>            |                             |
| Only 1 bedroom                            | -2.447                      |
| 2 bedrooms                                | -0.011                      |

|                                    |        |
|------------------------------------|--------|
| > 2 bedrooms                       | 0.884  |
| <b>Toilet inside the house</b>     |        |
| Yes                                | 0.996  |
| No                                 | -2.007 |
| <b>Types of toilet</b>             |        |
| Flush toilet                       | 0.562  |
| Pit toilet/bucket/ communal toilet | -3.223 |
| <b>Types of water sources</b>      |        |
| Taps inside the house              | 0.820  |
| Taps in the yard/water tank/       | -1.719 |
| communal tap/shared with others    | -4.098 |
| <b>Cooking with</b>                |        |
| Electricity                        | 0.209  |
| Gas/Parafin stove/Fire             | -3.306 |

---

The socioeconomic status (SES) of the children's households was assessed using multiple correspondence analyses (MCA) to be comparable among the schools. The household assets or ownership, the types of the house and construction materials, numbers of bedrooms, water sources, possession and type of latrine, and access to electricity were used to construct a socioeconomic index.

A variable with a positive component score corresponded to higher SES, and conversely, a variable with a negative score to lower SES
