# Supplementary material for: Association between gastrointestinal tract infections and glycated hemoglobin in school children of poor neighborhoods in Port Elizabeth, South Africa
Source: PLOS journal article supplement (doi:10.1371/journal.pntd.0006332), 2018-03-15
Supplement: S9 (10.1371/journal.pntd.0006332.s009) [file journal.pntd.0006332.s009]

**S6 Table. Adjusted association of *A. lumbricoides* and *T. trichiura* infection intensities and HbA1c measurement at baseline**

| Infections categories  | All with respective infection <sup>1</sup> |         |            | Only respective infection |         |            | Mutually adjusted for other infections or groups <sup>2</sup> |         |            |
|------------------------|--------------------------------------------|---------|------------|---------------------------|---------|------------|---------------------------------------------------------------|---------|------------|
|                        | N                                          | $\beta$ | 95% CI     | N                         | $\beta$ | 95% CI     | N                                                             | $\beta$ | 95% CI     |
| <i>A. lumbricoides</i> |                                            |         |            |                           |         |            |                                                               |         |            |
| No infection           | Reference category                         |         |            |                           |         |            |                                                               |         |            |
| Mild                   | 837                                        | -.057   | -.129 .014 | 305                       | -.037   | -.182 .107 | 837                                                           | -.059   | -.132 .013 |
| Moderate               | 837                                        | -.013   | -.071 .045 | 305                       | -.029   | -.163 .105 | 837                                                           | -.012   | -.072 .048 |
| Heavy                  | 837                                        | .011    | -.068 .090 | 305                       | -.073   | -.261 .115 | 837                                                           | .011    | -.074 .097 |
| <i>T. trichiura</i>    |                                            |         |            |                           |         |            |                                                               |         |            |
| No infection           | Reference category                         |         |            |                           |         |            |                                                               |         |            |
| Mild                   | 837                                        | .002    | -.063 .067 | 278                       | .042    | -.227 .317 | 837                                                           | .009    | -.058 .076 |
| Moderate               | 837                                        | -.014   | -.089 .062 | 278                       | NA      | NA         | 837                                                           | -.020   | -.100 .060 |
| Heavy                  | 837                                        | .061    | -.109 .231 | 278                       | NA      | NA         | 837                                                           | .056    | -.121 .233 |

<sup>1</sup>Single infection model with adjusted for age, gender, socioeconomic status, schools, hemoglobin level, height, BMI, blood pressure, physical activity, physical fitness, body temperature on the day of the HbA1c test

<sup>2</sup>Mutually adjusted models include either all single infections or all infection groups plus; *H. pylori* is included in single infection and infection group models
